# Supplementary material
Source: PubMed Central journal article supplement (PMC55744)
Supplement: nar_29_12_2479__1.pdf [file nar_29_12_2479__1.pdf]

## SUPPLEMENTARY MATERIAL

**Table S1.** *In vitro* selection for high-affinity RNA binding sequences of mouse Dazl

| 7 round sample         |
|------------------------|
| UCGUUCUAAGUUUAUCAUAGA  |
| UUGUGUAGUCCAAGUUAUGUA  |
| UUUCCCCAGUAAAGUUUGAUU  |
| UUGGCUCUCUGUCGUUUUGA   |
| UUUGGCUCCAUUGGUUGUGU   |
| UCGCCAUUGUUUUUGUUAGA   |
| UGCUGUGCUGUUGUAGUUUA   |
| UAGCCCACAUGUUUUUGUUUA  |
| UUGUUUGCCUGUUAGUAGUUA  |
| GUGCUUGUCAAGUUUGUUUU   |
| UGUCAUUAGUUUCGUAGUUUA  |
| UUCUCUUCGCCUUGUUUUUA   |
| UUUCGUUUUGUGUUUAGUUUA  |
| UUUUUCGUUCUUGUUUGUUU   |
| UUUGUUUCGGUUUUUGUUUA   |
| 9 round sample         |
| UUGCCUGUUGCAAGUCGGUUA  |
| UCCUGUUGUCCCAGUUGUAA   |
| UUGCCUGUUGCAGUGUUGUAA  |
| UUGCAGGCUCUUGUUGGUUU   |
| UGCCUGUUGCUUGUUUGUUUA  |
| UCCUGGUCCAUUCGUUUAAUU  |
| UUCGGUCUGUUAUAAGUUUAA  |
| UUAGUUUGUACGUUCAGUUUA  |
| UUAGUGUCAUUAGUUUAGUUGA |
| CUUUUGUGUGGUGUCCGGGAA  |
| UGGUCCUGUUCGUUAGUUUA   |
| UUUGUUUUUCGUUUAGUU     |
| UUUGUUUUUGCUGUUGUUUGA  |
| UUUGUUUGUCCGUUUUGUUUU  |
| UUUGUUUUAGUUUUAGUUUUA  |
| UGUUAGGUUUUGUUUUUGUUUU |

Samples of Dazl-binding sequences were taken after seven and nine rounds of selection. Residues flanked by three Us on either side are shown in bold.

Table S2. Genetic screening for high-affinity RNA binding sequences of mouse Dazl by a yeast three-hybrid screen

|     |            |                   |                   |                   |                   |                   |            |
|-----|------------|-------------------|-------------------|-------------------|-------------------|-------------------|------------|
| 1.  | UGAGAUUUUU | UUUUUUUUUU        | <b>GUUUUUUGGU</b> | UUUUUUUUUU        | <b>UGUUUUUUUU</b> | UUUUUUUUUU        | UUUUUUUUUU |
| 2.  | GUUUUGAUCC | AAUUCCUGGG        | CCUAGGUUUU        | GUUUUGUUUG        | UUUUUGUGUG        | UUUUUGUGUG        | UUUUUGUGUG |
| 3.  | UUUUUUUUUU | UUUUUUAAAU        | CUGUUUGUUU        | UCUGUCCUC         | UUUUUUAAUC        | UUUUUUAAUC        | UUUUUUAAUC |
| 4.  | AUUUGGAGUU | CUGCAUGCUU        | CUUGUAUGUU        | CAUGGACAUC        | UCUUUCAUUA        | GGUUAGGAAA        | GGUUUUUUUU |
| 5.  | UCAUUUUCCA | CGUUUUUCAG        | UGAUUUUUUC        | AUUUUUCAAG        | UCGUCAAGUG        | GAUGUUUCUC        | AUUUUCCAUG |
| 6.  | AUUUGUUUGU | GUUUUUUUUG        | <b>UUUGUUUUUG</b> | UUUUUUUUUU        | UUUGGCAAAG        | GAGUCCCAAU        | AUUAAGUAAA |
| 7.  | UUGAUUUUUC | ACUUUUUAJU        | UUUGUUUGUU        | UUUUUUUUUC        | ACUUAUUUCC        | AUUAGUCUUU        | UUUUUUUUUG |
| 8.  | UUUGUUUUUU | GAGUUUUUCG        | GUUUUUUUUG        | CUGUUUUUUU        | UUUUUUUUUC        | GGGUUUUUUG        | CCUGUUUUUC |
| 9.  | UUUUUUUUUC | AUGUUUGAAU        | UCACCAUUCU        | UUUUUUUUUA        | UGGCUUUUUG        | AUCUCUUCCA        | UGGUUUUUUC |
| 10. | UGCUUUUUUU | <b>UUUUUUUUUU</b> | UUUUUUUUUU        | <b>UUUUUUUUUU</b> | UUUUUUUUUU        | <b>UUUUUUUUUU</b> | UUUUUUUUUU |
| 11. | AUUUGAGUUA | AUUUUUUUUU        | UUUUUUUUUU        | UUUUUUUUUU        | UUUUUUUUUU        | UUUUUUUUUU        | UUUUUUUUUU |
| 12. | GUUUUUUUUU | <b>UUUUUUUUUU</b> | UUUUUUUUUU        | UUUUUUUUUU        | UUUUUUUUUU        | UUUUUUUUUU        | UUUUUUUUUU |
| 13. | UUUUUUUUUU | <b>UUUUUUUUUU</b> | UUUUUUUUUU        | UUUUUUUUUU        | UUUUUUUUUU        | UUUUUUUUUU        | UUUUUUUUUU |
| 14. | UUUUUUUUUU | <b>UUUUUUUUUU</b> | UUUUUUUUUU        | UUUUUUUUUU        | UUUUUUUUUU        | UUUUUUUUUU        | UUUUUUUUUU |
| 15. | UUUUUUUUUU | UUUUUUUUUU        | UUUUUUUUUU        | UUUUUUUUUU        | UUUUUUUUUU        | UUUUUUUUUU        | UUUUUUUUUU |
| 16. | AGUUUUUUUU | UUUUUUUUUU        | UUUUUUUUUU        | UUUUUUUUUU        | UUUUUUUUUU        | UUUUUUUUUU        | UUUUUUUUUU |
| 17. | UUUUUUUUUU | <b>UUUUUUUUUU</b> | UUUUUUUUUU        | UUUUUUUUUU        | UUUUUUUUUU        | UUUUUUUUUU        | UUUUUUUUUU |
| 18. | UUUUUUUUUU | UUUUUUUUUU        | UUUUUUUUUU        | UUUUUUUUUU        | UUUUUUUUUU        | UUUUUUUUUU        | UUUUUUUUUU |
| 19. | UUUUUUUUUU | UUUUUUUUUU        | UUUUUUUUUU        | UUUUUUUUUU        | UUUUUUUUUU        | UUUUUUUUUU        | UUUUUUUUUU |
| 20. | UUUUUUUUUU | UUUUUUUUUU        | UUUUUUUUUU        | UUUUUUUUUU        | UUUUUUUUUU        | UUUUUUUUUU        | UUUUUUUUUU |
| 21. | UUUUUUUUUU | UUUUUUUUUU        | UUUUUUUUUU        | UUUUUUUUUU        | UUUUUUUUUU        | UUUUUUUUUU        | UUUUUUUUUU |
| 22. | UUUUUUUUUU | UUUUUUUUUU        | UUUUUUUUUU        | UUUUUUUUUU        | UUUUUUUUUU        | UUUUUUUUUU        | UUUUUUUUUU |
| 23. | UUUUUUUUUU | UUUUUUUUUU        | UUUUUUUUUU        | UUUUUUUUUU        | UUUUUUUUUU        | UUUUUUUUUU        | UUUUUUUUUU |
| 24. | UUUUUUUUUU | UUUUUUUUUU        | UUUUUUUUUU        | UUUUUUUUUU        | UUUUUUUUUU        | UUUUUUUUUU        | UUUUUUUUUU |
| 25. | UUUUUUUUUU | UUUUUUUUUU        | UUUUUUUUUU        | UUUUUUUUUU        | UUUUUUUUUU        | UUUUUUUUUU        | UUUUUUUUUU |
| 26. | UUUUUUUUUU | UUUUUUUUUU        | UUUUUUUUUU        | UUUUUUUUUU        | UUUUUUUUUU        | UUUUUUUUUU        | UUUUUUUUUU |
| 27. | UUUUUUUUUU | UUUUUUUUUU        | UUUUUUUUUU        | UUUUUUUUUU        | UUUUUUUUUU        | UUUUUUUUUU        | UUUUUUUUUU |
| 28. | UUUUUUUUUU | UUUUUUUUUU        | UUUUUUUUUU        | UUUUUUUUUU        | UUUUUUUUUU        | UUUUUUUUUU        | UUUUUUUUUU |
| 29. | UUUUUUUUUU | UUUUUUUUUU        | UUUUUUUUUU        | UUUUUUUUUU        | UUUUUUUUUU        | UUUUUUUUUU        | UUUUUUUUUU |
| 30. | UUUUUUUUUU | UUUUUUUUUU        | UUUUUUUUUU        | UUUUUUUUUU        | UUUUUUUUUU        | UUUUUUUUUU        | UUUUUUUUUU |
| 31. | UUUUUUUUUU | UUUUUUUUUU        | UUUUUUUUUU        | UUUUUUUUUU        | UUUUUUUUUU        | UUUUUUUUUU        | UUUUUUUUUU |
| 32. | UUUUUUUUUU | UUUUUUUUUU        | UUUUUUUUUU        | UUUUUUUUUU        | UUUUUUUUUU        | UUUUUUUUUU        | UUUUUUUUUU |
| 33. | UUUUUUUUUU | UUUUUUUUUU        | UUUUUUUUUU        | UUUUUUUUUU        | UUUUUUUUUU        | UUUUUUUUUU        | UUUUUUUUUU |
| 34. | UUUUUUUUUU | UUUUUUUUUU        | UUUUUUUUUU        | UUUUUUUUUU        | UUUUUUUUUU        | UUUUUUUUUU        | UUUUUUUUUU |
| 35. | UUUUUUUUUU | UUUUUUUUUU        | UUUUUUUUUU        | UUUUUUUUUU        | UUUUUUUUUU        | UUUUUUUUUU        | UUUUUUUUUU |
| 36. | UUUUUUUUUU | UUUUUUUUUU        | UUUUUUUUUU        | UUUUUUUUUU        | UUUUUUUUUU        | UUUUUUUUUU        | UUUUUUUUUU |
| 37. | UUUUUUUUUU | UUUUUUUUUU        | UUUUUUUUUU        | UUUUUUUUUU        | UUUUUUUUUU        | UUUUUUUUUU        | UUUUUUUUUU |
| 38. | UUUUUUUUUU | UUUUUUUUUU        | UUUUUUUUUU        | UUUUUUUUUU        | UUUUUUUUUU        | UUUUUUUUUU        | UUUUUUUUUU |
| 39. | UUUUUUUUUU | UUUUUUUUUU        | UUUUUUUUUU        | UUUUUUUUUU        | UUUUUUUUUU        | UUUUUUUUUU        | UUUUUUUUUU |
| 40. | UUUUUUUUUU | UUUUUUUUUU        | UUUUUUUUUU        | UUUUUUUUUU        | UUUUUUUUUU        | UUUUUUUUUU        | UUUUUUUUUU |
| 41. | UUUUUUUUUU | UUUUUUUUUU        | UUUUUUUUUU        | UUUUUUUUUU        | UUUUUUUUUU        | UUUUUUUUUU        | UUUUUUUUUU |
| 42. | UUUUUUUUUU | UUUUUUUUUU        | UUUUUUUUUU        | UUUUUUUUUU        | UUUUUUUUUU        | UUUUUUUUUU        | UUUUUUUUUU |
| 43. | UUUUUUUUUU | UUUUUUUUUU        | UUUUUUUUUU        | UUUUUUUUUU        | UUUUUUUUUU        | UUUUUUUUUU        | UUUUUUUUUU |
| 44. | UUUUUUUUUU | UUUUUUUUUU        | UUUUUUUUUU        | UUUUUUUUUU        | UUUUUUUUUU        | UUUUUUUUUU        | UUUUUUUUUU |
| 45. | UUUUUUUUUU | UUUUUUUUUU        | UUUUUUUUUU        | UUUUUUUUUU        | UUUUUUUUUU        | UUUUUUUUUU        | UUUUUUUUUU |

Seven contiguous blocks of 10 nt containing the highest U content were selected for presentation. The first 45 strongly binding sequences sequenced are shown, sequence no. 45 corresponds to PRL-1 tyrosine phosphatase. Residues flanked by three Us on either side are in bold.
